# Supplementary material for: Effects of memantine on mania‐like phenotypes exhibited by Drosophila Shaker mutants
Source: PubMed Central journal article supplement (PMC10324369; doi:10.1111/cns.14145), 2023-03-21

- WT Control
- WT Mem 0.025 mg/g
- WT Mem 0.05 mg/g
- WT Mem 0.1 mg/g
- WT Mem 0,25 mg/g

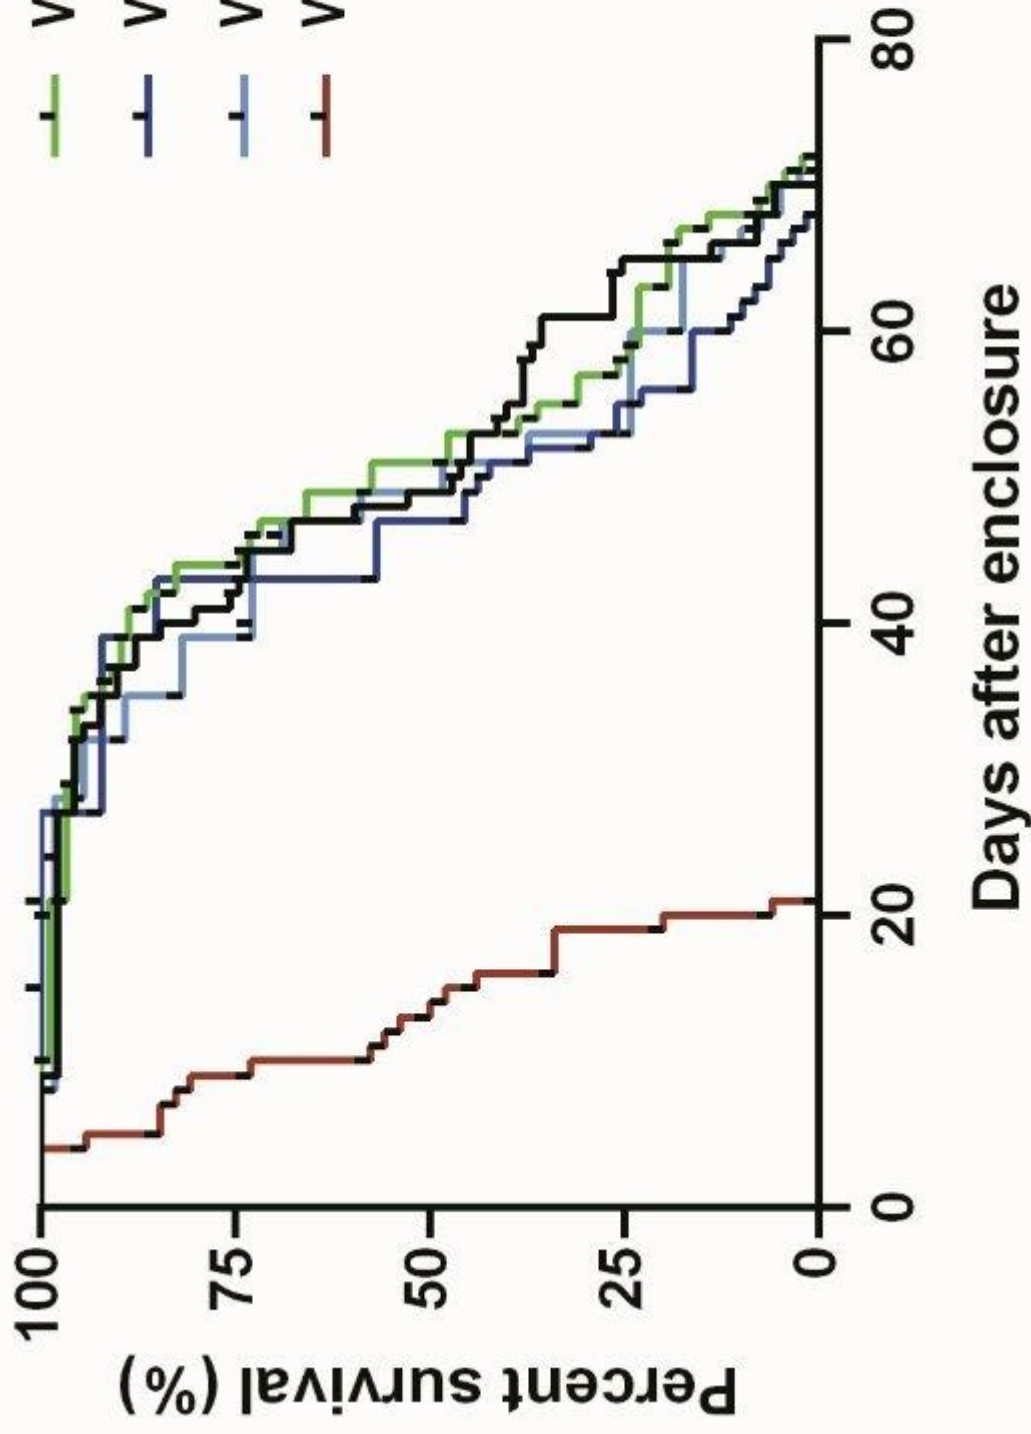

Supplement: CNS-29-1750-s001.pdf [file CNS-29-1750-s001.pdf]
