# Supplementary material for: Effects of memantine on mania‐like phenotypes exhibited by Drosophila Shaker mutants
Source: PubMed Central journal article supplement (PMC10324369; doi:10.1111/cns.14145), 2023-03-21
Supplement: CNS-29-1750-s002.pdf [file CNS-29-1750-s002.pdf]

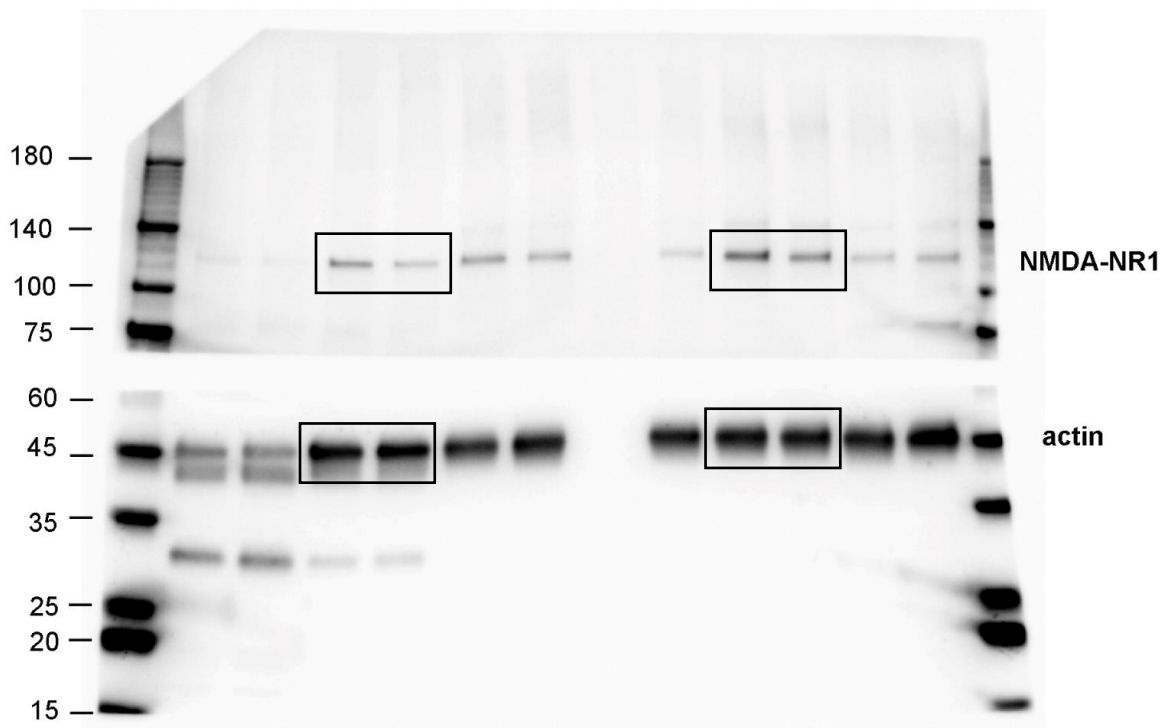

Full unedited blot for fig. 6 A

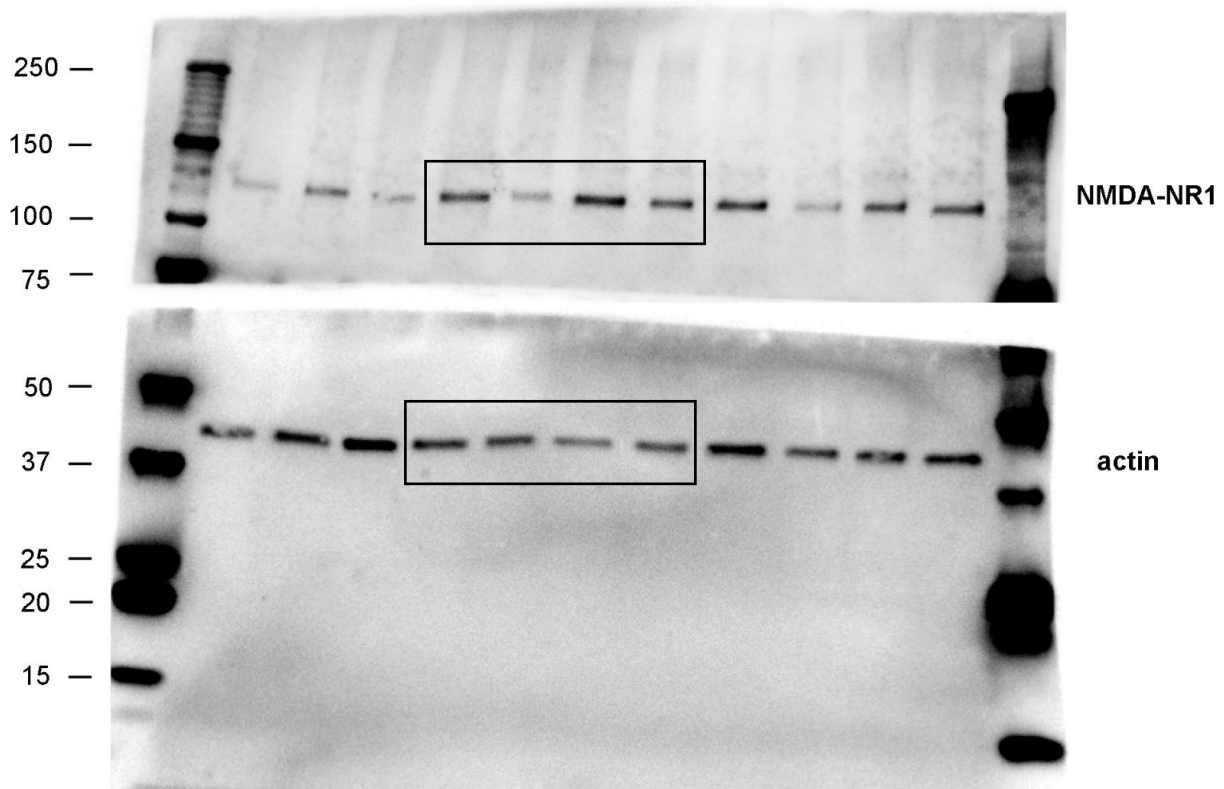

Full unedited blot for fig. 6 C
