# Supplementary material for: Effects of memantine on mania‐like phenotypes exhibited by Drosophila Shaker mutants
Source: PubMed Central journal article supplement (PMC10324369; doi:10.1111/cns.14145), 2023-03-21

**NMDA-NR1**

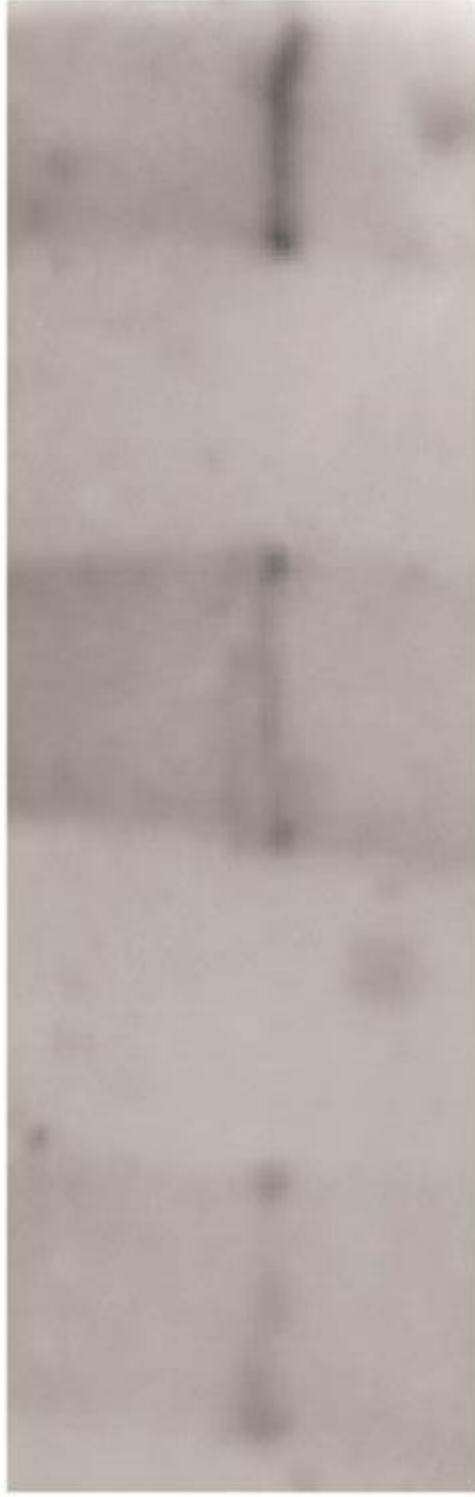

**Actin**

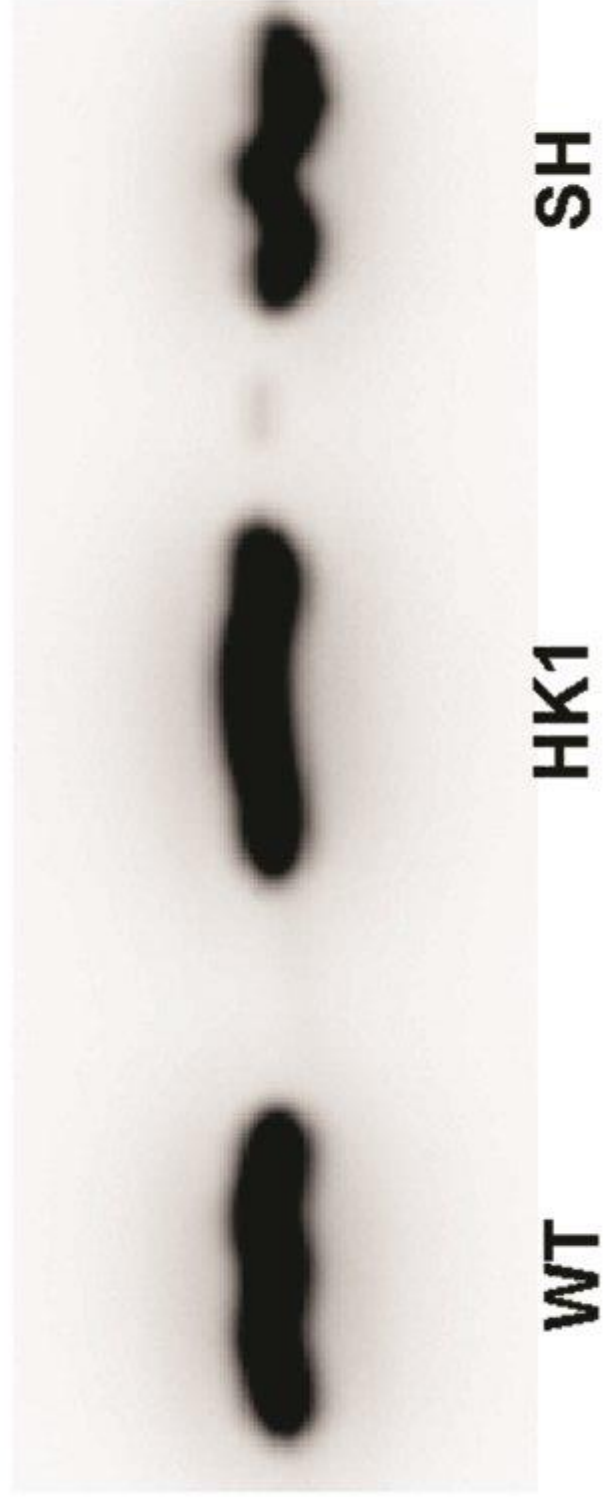

Supplement: CNS-29-1750-s004.pdf [file CNS-29-1750-s004.pdf]
